# Supplementary material
Source: PubMed Central journal article supplement (PMC5397111)
Supplement: NIHMS818895-supplement-01.pdf [file NIHMS818895-supplement-01.pdf]

**APPENDIX A**  
**Table S1**  
**Eighth Grade Models Predicting Tobacco Use, 2000-2006**

| Variable <sup>a</sup>                       | Current cigarette use<br>OR (95%CI) | Daily cigarette use<br>OR (95%CI) | Current smokeless tobacco use<br>OR (95%CI) |
|---------------------------------------------|-------------------------------------|-----------------------------------|---------------------------------------------|
| <b>State tobacco policies</b>               |                                     |                                   |                                             |
| Cigarette excise tax (\$)                   | 0.83 (0.73, 0.95)                   | 0.78 (0.63, 0.97)                 | 0.61 (0.43, 0.86)                           |
| Smoke-free air score                        | 0.97 (0.93, 1.01)                   | 0.94 (0.89, 0.999)                | 0.94 (0.85, 1.06)                           |
| PUP score                                   | 1.04 (0.99, 1.09)                   | 1.04 (0.97, 1.11)                 | 1.12 (0.98, 1.30)                           |
| Youth access to tobacco score               | 1.00 (0.99, 1.01)                   | 1.00 (0.99, 1.01)                 | 1.02 (0.99, 1.04)                           |
| Synar retailer violation rate               | 1.00 (0.99, 1.01)                   | 1.00 (0.98, 1.01)                 | 0.98 (0.95, 1.02)                           |
| <b>School tobacco policy</b>                |                                     |                                   |                                             |
| Tobacco Policy Monitoring Score             | 1.00 (0.92, 1.08)                   | 0.98 (0.90, 1.07)                 | 1.05 (0.86, 1.29)                           |
| <b>Exposure to anti-smoking advertising</b> |                                     |                                   |                                             |
| 0 TRP                                       | Ref.                                | Ref.                              | Ref.                                        |
| < 1 TRP                                     | 0.82 (0.72, 0.93)                   | 0.86 (0.74, 1.003)                | 0.63 (0.47, 0.84)                           |
| ≥ 1 TRP                                     | 0.72 (0.55, 0.93)                   | 0.75 (0.54, 1.04)                 | 0.50 (0.30, 0.82)                           |

**Note.**

**a Each model adjusts for the following covariates: age, sex, race, type of school, school size, parental education level, number of parents at home, percent of students in the school on subsidized lunch, percent of students Black, percent of students Hispanic population density, and state tobacco acres.**

**APPENDIX A**  
**Table S2**  
**Tenth Grade Models Predicting Tobacco Use, 2000-2006**

| Variable <sup>a</sup>                       | Current cigarette use<br>OR (95%CI) | Daily cigarette use<br>OR (95%CI) | Current smokeless tobacco use<br>OR (95%CI) |
|---------------------------------------------|-------------------------------------|-----------------------------------|---------------------------------------------|
| <b>State tobacco policies</b>               |                                     |                                   |                                             |
| Cigarette excise tax (\$)                   | 0.99 (0.91, 1.07)                   | 0.97 (0.88, 1.07)                 | 0.87 (0.70, 1.07)                           |
| Smoke-free air score                        | 0.99 (0.95, 1.03)                   | 0.98 (0.94, 1.03)                 | 0.96 (0.90, 1.03)                           |
| PUP score                                   | 0.98 (0.92, 1.04)                   | 0.99 (0.92, 1.07)                 | 1.11 (1.01, 1.23)                           |
| Youth access to tobacco score               | 1.00 (0.99, 1.01)                   | 1.00 (0.98, 1.01)                 | 1.01 (0.99, 1.02)                           |
| Synar retailer violation rate               | 1.01 (0.998, 1.01)                  | 1.01 (1.000, 1.02)                | 1.00 (0.98, 1.02)                           |
| <b>School tobacco policy</b>                |                                     |                                   |                                             |
| Tobacco Policy Monitoring Score             | 1.03 (0.95, 1.11)                   | 1.00 (0.93, 1.08)                 | 0.99 (0.86, 1.15)                           |
| <b>Exposure to anti-smoking advertising</b> |                                     |                                   |                                             |
| 0 TRP                                       | Ref.                                | Ref.                              | Ref.                                        |
| < 1 TRP                                     | 1.03 (0.90, 1.17)                   | 1.03 (0.89, 1.19)                 | 0.89 (0.72, 1.10)                           |
| ≥ 1 TRP                                     | 0.98 (0.83, 1.16)                   | 0.93 (0.75, 1.16)                 | 0.81 (0.58, 1.14)                           |

**Note.**

**a** Each model adjusts for the following covariates: age, sex, race, type of school, school size, parental education level, number of parents at home, percent of students in the school on subsidized lunch, percent of students Black, percent of students Hispanic population density, and state tobacco acres.

**APPENDIX A**  
**Table S3**  
**Twelfth Grade Models<sup>a</sup> Predicting Tobacco Use, 2000-2006**

| Variable <sup>a</sup>                       | Current cigarette use<br>OR (95%CI) | Daily cigarette use<br>OR (95%CI) | Current smokeless tobacco use<br>OR (95%CI) |
|---------------------------------------------|-------------------------------------|-----------------------------------|---------------------------------------------|
| <b>State tobacco policies</b>               |                                     |                                   |                                             |
| Cigarette excise tax (\$)                   | 0.81 (0.72, 0.92)                   | 0.83 (0.72, 0.95)                 | 0.65 (0.48, 0.88)                           |
| Smoke-free air score                        | 0.96 (0.94, 0.98)                   | 0.97 (0.94, 0.995)                | 0.88 (0.80, 0.96)                           |
| PUP score                                   | 1.06 (0.997, 1.13)                  | 1.04 (0.97, 1.13)                 | 1.13 (0.97, 1.32)                           |
| Youth access to tobacco score               | 1.00 (0.99, 1.01)                   | 0.99 (0.98, 1.003)                | 1.02 (0.99, 1.05)                           |
| Synar retailer violation rate               | 1.01 (1.003, 1.02)                  | 1.01 (1.002, 1.02)                | 1.01 (1.001, 1.01)                          |
| <b>School tobacco policy</b>                |                                     |                                   |                                             |
| Tobacco Policy Monitoring Score             | 1.00 (0.91, 1.09)                   | 1.00 (0.91, 1.11)                 | 0.99 (0.82, 1.18)                           |
| <b>Exposure to anti-smoking advertising</b> |                                     |                                   |                                             |
| 0 TRP                                       | Ref.                                | Ref.                              | Ref.                                        |
| < 1 TRP                                     | 0.93 (0.82, 1.05)                   | 0.90 (0.79, 1.02)                 | 0.79 (0.58, 1.09)                           |
| ≥ 1 TRP                                     | 0.90 (0.76, 1.07)                   | 0.89 (0.75, 1.05)                 | 1.02 (0.73, 1.44)                           |

**Note.**

**a** Each model adjusts for the following covariates: age, sex, race, type of school, school size, parental education level, number of parents at home, percent of students in the school on subsidized lunch, percent of students Black, percent of students Hispanic population density, and state tobacco acres.
